# Supplementary material for: Neonatal health care costs of very preterm babies in England: a retrospective analysis of a national birth cohort
Source: HighWire-hosted journal article supplement (doi:10.1136/bmjpo-2022-001818), 2023-05-01
Supplement: bmjpo-2022-001818supp001_data_supplement.pdf [file bmjpo-2022-001818supp001_data_supplement.pdf]

## Supplementary file

### Multiple Imputation Methods

An imputation model was constructed, that included complete data on baseline baby and maternal characteristics, and the total cost of care provided at each level of care (intensive care, high-dependency care, special care without carer, special care with carer and normal care). We imputed costs for each level of care for babies with missing data (see Figure A1 below). Baseline characteristics included gestational age at birth, gender, number of fetuses, birthweight, neonatal death, maternal age and mode of delivery. All baseline covariates were subject to a small number of missing data that was imputed using conditional mean imputation prior to inclusion in the imputation model. A predictive mean matching estimation using chained equations with 50 imputations was implemented [1]. Mean estimates and estimates of standard errors were combined between imputed datasets using Rubin's rule [2] without any adjustment. Combined mean cost estimates and adjusted standard errors (SE) by gestational week across imputed datasets are shown to report the results of the multiple imputation analysis (Table A5 below).

**Figure A1: Flow of NNRD data available to estimate neonatal care costs for the very preterm babies discharged from neonatal units in England between 2014-2018.**

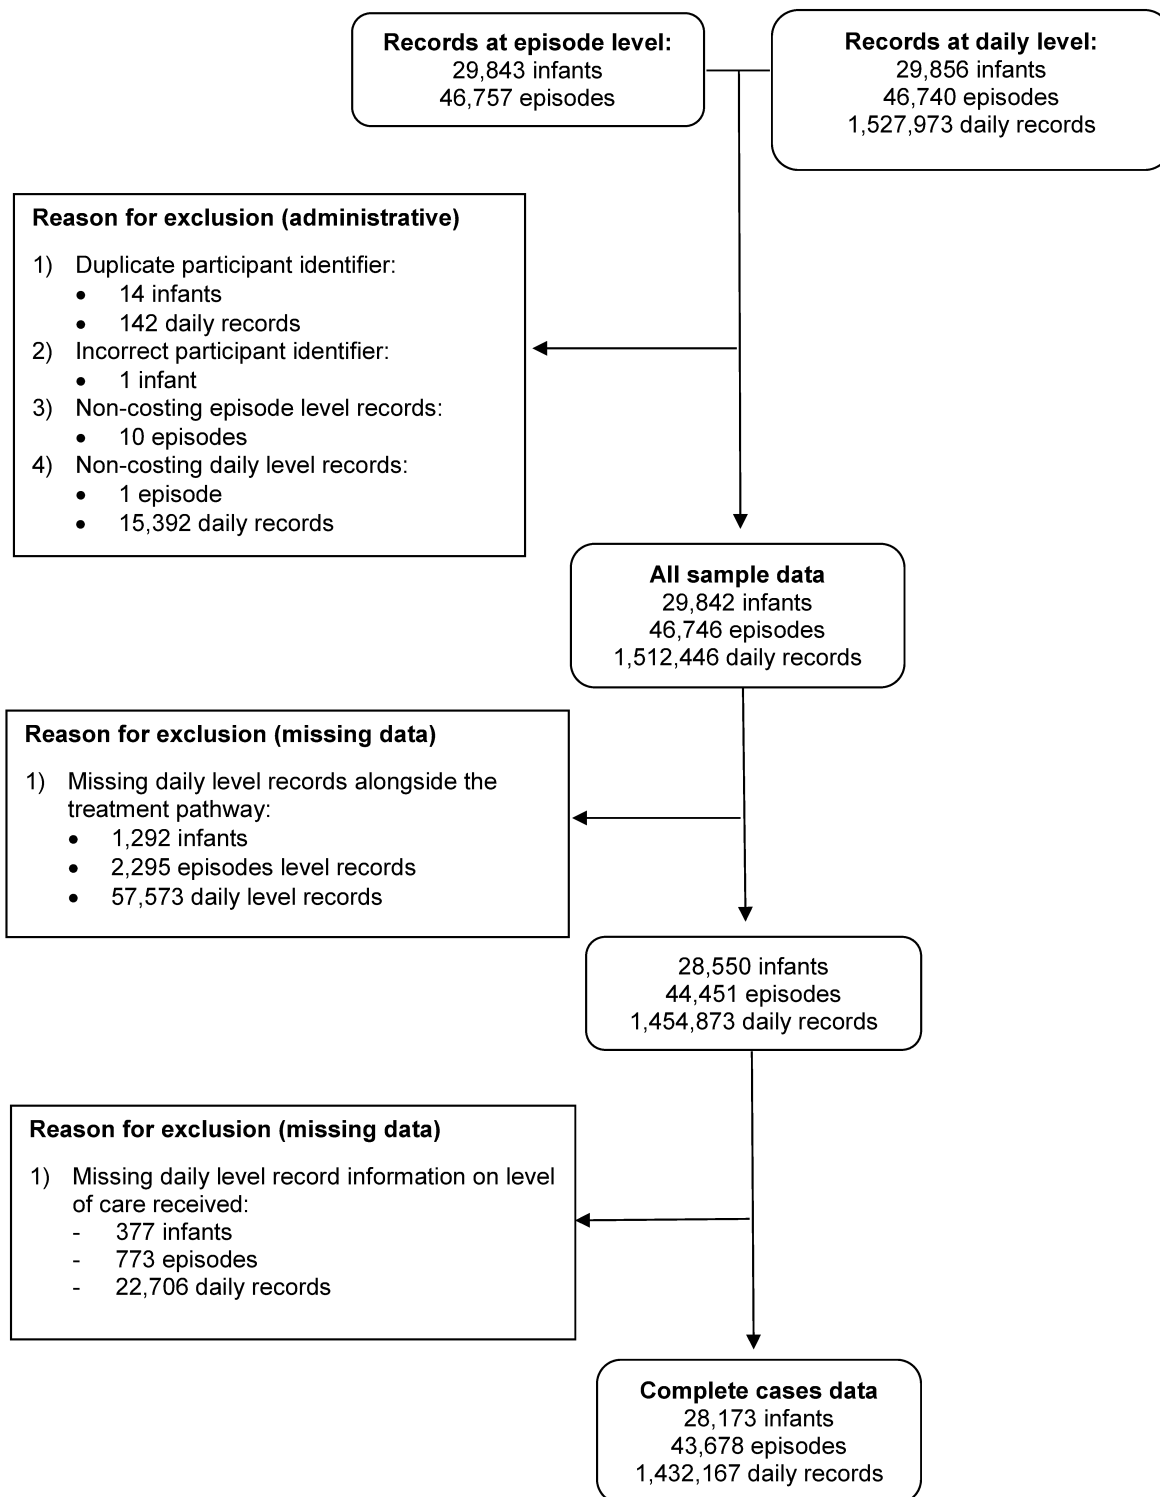

**Table A1: Unit costs (expressed in 2018/19 UK pound sterling) used within the cost analysis**

| Resource Use Item                                                          | Unit cost 2018/19 UK £ | Source                                                                                                               |
|----------------------------------------------------------------------------|------------------------|----------------------------------------------------------------------------------------------------------------------|
| <i>Neonatal unit inpatient bed days</i>                                    |                        |                                                                                                                      |
| - intensive care level                                                     | £1,531                 | National Cost Collection Data Publication. National Schedule of NHS Costs 2018/19. HRG code XA01Z [3]                |
| - high dependency care level                                               | £1,007                 | National Cost Collection Data Publication. National Schedule of NHS Costs 2018/19. HRG code XA02Z [3]                |
| - special care level, (carer not resident alongside baby)                  | £661                   | National Cost Collection Data Publication. National Schedule of NHS Costs 2018/19. HRG code XA03Z [3]                |
| - special care level, (carer resident at cot-side and caring for baby)     | £493                   | National Cost Collection Data Publication. National Schedule of NHS Costs 2018/19. HRG code XA04Z [3]                |
| - normal care level                                                        | £514                   | National Cost Collection Data Publication. National Schedule of NHS Costs 2018/19. HRG code XA05Z [3]                |
|                                                                            |                        |                                                                                                                      |
| Neonatal Critical Care, Transportation                                     | £1,257                 | National Cost Collection Data Publication. National Schedule of NHS Costs 2018/19. HRG code XA06Z [3]                |
|                                                                            |                        |                                                                                                                      |
| Inhaled nitric oxide (iNO) (per day)                                       | £267                   | European iNO Registry for Liverpool Women's NHS Foundation Trust                                                     |
| <i>Surfactant replacement – poractant alfa (per day, by birth weight)*</i> |                        |                                                                                                                      |
| - Birth weight ≤0.6kg (1 bottle 1.5ml)                                     | £282                   | British National Formulary online: NHS indicative price [4]                                                          |
| - 0.7kg ≤ Birth weight ≤1.2kg (1 bottle 3ml)                               | £547                   |                                                                                                                      |
| - 1.3kg ≤ Birth weight ≤1.8kg (1 bottle 3ml and 1 bottle 1.5ml)            | £829                   |                                                                                                                      |
| - 1.9kg ≤ Birth weight ≤2.4kg (2 bottles 3ml)                              | £1,095                 |                                                                                                                      |
| - 2.5kg ≤ Birth weight ≤3kg (2 bottles 3ml and 1 bottle 1.5ml)             | £1,376                 |                                                                                                                      |
| - 3.1kg ≤ Birth weight ≤3.6kg (3 bottles 3ml)                              | £1,642                 |                                                                                                                      |
| - 3.7kg ≤ Birth weight ≤4.2kg (3 bottles 3ml and 1 bottle 1.5ml)           | £1,924                 |                                                                                                                      |
|                                                                            |                        |                                                                                                                      |
| Total parental nutrition (per day, over 14 days of use)**                  | £48                    | Walter et al. (2012); inflated to 2018/19 prices [5]                                                                 |
|                                                                            |                        |                                                                                                                      |
| Palivizumab (per day at 15ml/kg birth weight)                              | £435                   | British National Formulary online: NHS indicative price [4]                                                          |
|                                                                            |                        |                                                                                                                      |
| ROP surgery                                                                | £1,731                 | National Cost Collection Data Publication. National Schedule of NHS Costs 2018/19. HRG code BZ86C, elective care [3] |
|                                                                            |                        |                                                                                                                      |
| Neonatal surgery***                                                        | Various                | HRG4+ 2017/18 Reference Costs Grouper; inflated to 2018/19 prices [6]                                                |

ROP: retinopathy of prematurity;

\*Surfactant use was reported from 3 separate fields from the datasets: Surfactant given today, Drugs given today and Surfactant given at resuscitation. The first two variables were recorded at the daily level, while the third variable was recorded at the episode level and therefore we defined its use for the first daily record of this episode;

\*\*The use of total parental nutrition (TPN) was reported from 2 separate fields from the datasets: TPN given today and Drugs given today;

\*\*\*Different types of neonatal surgery were identified from OPCS and ICD-10 codes using the HRG4+ 2017/18 Reference Costs Grouper Software.

**Table A2: Baseline characteristics of babies born between 27 and 31 weeks gestation with and without missing NNRD data on daily records or level of daily care provided – data are frequencies (percentages) unless otherwise stated**

|                                       | Babies with missing daily records or level of care data<br>(n=1,669) | Babies with complete information<br>(n=28,173) | p value* |
|---------------------------------------|----------------------------------------------------------------------|------------------------------------------------|----------|
|                                       | n (%)                                                                | n (%)                                          |          |
| <b>Gestational age at birth</b>       |                                                                      |                                                |          |
| 27 weeks                              | 284 (17.0%)                                                          | 3,296 (11.7%)                                  | p<0.001  |
| 28 weeks                              | 304 (18.2%)                                                          | 4,370 (15.5%)                                  |          |
| 29 weeks                              | 289 (17.3%)                                                          | 5,036 (17.9%)                                  |          |
| 30 weeks                              | 354 (21.2%)                                                          | 6,625 (23.5%)                                  |          |
| 31 weeks                              | 435 (26.1%)                                                          | 8,827 (31.3%)                                  |          |
| Missing                               | 3 (0.2%)                                                             | 19 (0.1%)                                      |          |
| <b>Gender of baby</b>                 |                                                                      |                                                |          |
| Male                                  | 961 (57.6%)                                                          | 15,363 (54.5%)                                 | 0.046    |
| Female                                | 704 (42.2%)                                                          | 12,755 (45.3%)                                 |          |
| Missing                               | 4 (0.2%)                                                             | 55 (0.2%)                                      |          |
| <b>Number of fetus</b>                |                                                                      |                                                |          |
| Singleton birth                       | 1,229 (73.6%)                                                        | 20,555 (73.0%)                                 | 0.632    |
| Multiple birth                        | 438 (26.2%)                                                          | 7,598 (27.0%)                                  |          |
| Missing                               | 2 (0.1%)                                                             | 20 (0.1%)                                      |          |
| <b>Birthweight (g) - mean(SD)</b>     | 1,282.6 (358.2)                                                      | 1,330.2 (332.2)                                | p<0.001  |
| Missing                               | 8 (0.5%)                                                             | 82 (0.3%)                                      |          |
| <b>Apgar score at 5min - mean(SD)</b> | 8.1 (1.7)                                                            | 8.1 (1.8)                                      | 0.030    |
| Missing                               | 156 (9.4%)                                                           | 2,877 (10.2%)                                  |          |
| <b>Died in neonatal care</b>          | 22 (1.3%)                                                            | 985 (3.5%)                                     | p<0.001  |
| Missing                               | 1 (0.1%)                                                             | 0 (0.0%)                                       |          |

SD: standard deviation; \*Continuous variables were tested by independent t-test, categorical variables by chi-square test

**Table A3: A comparison of gestational age at birth between very preterm births in the study cohort and those identified from national live births statistics for England for in 2016, 2017 and 2018**

| Year        | Study cohort  | National data for England from Office for National Statistics (ONS) | p-value* |
|-------------|---------------|---------------------------------------------------------------------|----------|
| <b>2016</b> |               |                                                                     |          |
| 27          | 704 (12.6%)   | 768 (12.6%)                                                         |          |
| 28          | 883 (15.8%)   | 950 (15.5%)                                                         |          |
| 29          | 1,015 (18.2%) | 1,101 (18.0%)                                                       | 0.977    |
| 30          | 1,282 (23.0%) | 1,412 (23.1%)                                                       |          |
| 31          | 1,689 (30.3%) | 1,881 (30.8%)                                                       |          |
| <b>2017</b> |               |                                                                     |          |
| 27          | 638 (11.7%)   | 690 (11.6%)                                                         |          |
| 28          | 860 (15.7%)   | 949 (16.0%)                                                         |          |
| 29          | 991 (18.1%)   | 1,078 (18.2%)                                                       | 0.987    |
| 30          | 1,305 (23.9%) | 1,427 (24.1%)                                                       |          |
| 31          | 1,670 (30.6%) | 1,787 (30.1%)                                                       |          |
| <b>2018</b> |               |                                                                     |          |
| 27          | 476 (11.0%)   | 696 (12.0%)                                                         |          |
| 28          | 620 (14.3%)   | 888 (15.3%)                                                         |          |
| 29          | 760 (17.5%)   | 1,039 (17.9%)                                                       | 0.151    |
| 30          | 1,035 (23.8%) | 1,358 (23.4%)                                                       |          |
| 31          | 1,448 (33.3%) | 1,835 (31.6%)                                                       |          |

\*chi-square test of proportions

Source: Office for National Statistics; births extracted from a dataset containing birth registrations. 2016 and 2017 figures exclude births where mothers' usual residence was outside of England. 2018 figures include births where mothers' usual residence was in England and Wales. All figures were based on babies born in the calendar year.

**Table A4: Counts of hospital transfers, surgeries and days receiving other non-routine procedures during neonatal admissions for very preterm babies in England for the period 2014-2018 (n = 28,154)\***

|                                                   | <b>27 weeks<br/>gestation<br/>n=3,296</b> | <b>28 weeks<br/>gestation<br/>n=4,370</b> | <b>29 weeks<br/>gestation<br/>n=5,036</b> | <b>30 weeks<br/>gestation<br/>n=6,625</b> | <b>31 weeks<br/>gestation<br/>n=8,827</b> |
|---------------------------------------------------|-------------------------------------------|-------------------------------------------|-------------------------------------------|-------------------------------------------|-------------------------------------------|
| <b>Hospital transfer within 24 hours of birth</b> |                                           |                                           |                                           |                                           |                                           |
| Number of transfers                               | 287                                       | 330                                       | 293                                       | 286                                       | 311                                       |
| Number (%) of babies receiving                    | 276 (8.4%)                                | 323 (7.4%)                                | 286 (5.7%)                                | 282 (4.3%)                                | 307 (3.5%)                                |
| <b>Hospital transfer after 24 hours of birth</b>  |                                           |                                           |                                           |                                           |                                           |
| Number of transfers                               | 872                                       | 836                                       | 713                                       | 659                                       | 571                                       |
| Number (%) of babies receiving                    | 654 (19.8%)                               | 665 (15.2%)                               | 593 (11.8%)                               | 588 (8.9%)                                | 523 (5.9%)                                |
| <b>Nitric oxide</b>                               |                                           |                                           |                                           |                                           |                                           |
| Number of days of care                            | 1,333                                     | 1,363                                     | 953                                       | 918                                       | 660                                       |
| Number (%) of babies receiving                    | 425 (12.9%)                               | 467 (10.7%)                               | 360 (7.1%)                                | 419 (6.3%)                                | 326 (3.7%)                                |
| <b>Surfactant replacement</b>                     |                                           |                                           |                                           |                                           |                                           |
| Number of times given                             | 5,932                                     | 6,561                                     | 5,525                                     | 4,201                                     | 3,667                                     |
| Number (%) of babies receiving                    | 2,743 (83.2%)                             | 3,258 (74.6%)                             | 3,023 (60.0%)                             | 2,677 (40.4%)                             | 2,386 (27.0%)                             |
| <b>TPN</b>                                        |                                           |                                           |                                           |                                           |                                           |
| Number of days of care (over 14 days' use)        | 20,182                                    | 17,919                                    | 11,200                                    | 7,525                                     | 5,074                                     |
| Number (%) of babies receiving                    | 1,391 (42.2%)                             | 1,411 (32.3%)                             | 990 (19.7%)                               | 692 (10.4%)                               | 515 (5.8%)                                |
| <b>Palivizumab</b>                                |                                           |                                           |                                           |                                           |                                           |
| Number of times given                             | 90                                        | 103                                       | 52                                        | 31                                        | 14                                        |
| Number (%) of babies receiving                    | 77 (2.3%)                                 | 68 (1.6%)                                 | 38 (0.8%)                                 | 26 (0.4%)                                 | 12 (0.1%)                                 |
| <b>ROP surgery</b>                                |                                           |                                           |                                           |                                           |                                           |
| Number of surgeries                               | 116                                       | 53                                        | 36                                        | 34                                        | 15                                        |
| Number (%) of babies receiving                    | 91 (2.8%)                                 | 45 (1.0%)                                 | 32 (0.6%)                                 | 30 (0.5%)                                 | 15 (0.2%)                                 |
| <b>Neonatal surgery</b>                           |                                           |                                           |                                           |                                           |                                           |
| Number of surgeries                               | 291                                       | 283                                       | 203                                       | 175                                       | 169                                       |
| Number (%) of babies receiving                    | 255 (7.7%)                                | 266 (6.1%)                                | 185 (3.7%)                                | 162 (2.4%)                                | 161 (1.8%)                                |

TPN: total parenteral nutrition, ROP: retinopathy or prematurity.\*19 babies had missing gestational age information.

**Table A5: Mean (SE) level of care cost per baby (2018/19 UK £) for very preterm babies in England over the period 2014-2018 using multiple imputation (n = 29,842)**

|                                  | <b>27 weeks gestation<br/>(n = 3,580)</b> | <b>28 weeks gestation<br/>(n = 4,674)</b> | <b>29 weeks gestation<br/>(n = 5,325)</b> | <b>30 weeks gestation<br/>(n = 6,979)</b> | <b>31 weeks gestation<br/>(n = 9,284)</b> |
|----------------------------------|-------------------------------------------|-------------------------------------------|-------------------------------------------|-------------------------------------------|-------------------------------------------|
| <b>Resource use item</b>         | <b>Mean (SE) cost per<br/>baby</b>        | <b>Mean (SE) cost per<br/>baby</b>        | <b>Mean (SE) cost per<br/>baby</b>        | <b>Mean (SE) cost per<br/>baby</b>        | <b>Mean (SE) cost per<br/>baby</b>        |
| <b>Level of daily care</b>       |                                           |                                           |                                           |                                           |                                           |
| Intensive care                   | £27,845 (£436)                            | £20,883 (£309)                            | £14,512 (£217)                            | £8,445 (£133)                             | £5,097 (£108)                             |
| High-dependency care             | £27,212 (£386)                            | £19,284 (£292)                            | £11,486 (£198)                            | £7,788 (£135)                             | £5,112 (£82)                              |
| Special care without carer       | £20,254 (£201)                            | £21,506 (£164)                            | £21,712 (£127)                            | £19,883 (£98)                             | £16,434 (£75)                             |
| Special care with carer          | £762 (£22)                                | £829 (£22)                                | £825 (£20)                                | £850 (£18)                                | £832 (£15)                                |
| Normal care                      | £0 (£0)                                   | £0.44 (£0.44)                             | £0 (£0)                                   | £0.24 (£0.24)                             | £0.52 (£0.42)                             |
| <b>Total level of care costs</b> | <b>£76,072 (£613)</b>                     | <b>£62,502 (£461)</b>                     | <b>£48,534 (£326)</b>                     | <b>£36,966 (£222)</b>                     | <b>£27,475 (£159)</b>                     |

SE: standard error



## References

1. White, I.R., Royston, P., and Wood, A.M. Multiple imputation using chained equations: Issues and guidance for practice. *Stat Med*, 2011. **30**(4): 377-99.
2. Little, R.J. and Rubin, D.B. *Statistical Analysis with Missing Data*. 2nd ed. Wiley Series in Probability and Statistics. 2002, Hoboken, NJ: Wiley.
3. NHS England. (2019). National Cost Collection Data Publication. National Schedule of NHS Costs 2018/2019. Available from <https://www.england.nhs.uk/publication/2018-19-national-cost-collection-data-publication/>. [Accessed 12th November 2022].
4. Joint Formulary Committee. British National Formulary (online). Available from <http://www.medicinescomplete.com>. [Accessed 12th November 2022].
5. Walter, E., Liu, F.X., Maton, P., Storme, T., Perrinet, M., von Delft, O., Puntis, J., Hartigan, D., Dragosits, A., and Sondhi, S. Cost analysis of neonatal and pediatric parenteral nutrition in Europe: a multi-country study. *Eur J Clin Nutr*, 2012. **66**(5): 639-44.
6. NHS Digital. HRG4 2017/18 Local Payment Grouper. Available from <https://digital.nhs.uk/services/national-casemix-office/downloads-groupers-and-tools/payment-hrg4-2017-18-local-payment-grouper>. [Accessed 12 November 2022].

**List of participating members of the UK Neonatal Collaborative in the OPTI-PREM Study**

| <b>Institution</b>                             | <b>Neonatal Network</b>                                               | <b>Clinical Lead</b>  |
|------------------------------------------------|-----------------------------------------------------------------------|-----------------------|
| Airedale General Hospital                      | Yorkshire Neonatal Network                                            | Dr Matthew Babirecki  |
| Barnet Hospital                                | London - North Central Neonatal Network                               | Dr Tim Wickham        |
| Barnsley District General Hospital             | North Trent Neonatal Network                                          | Dr Sanaa Hamdan       |
| Basildon Hospital                              | London - North East and North Middlesex Neonatal Network              | Dr Aashish Gupta      |
| Basingstoke & North Hampshire Hospital         | Thames Valley & Wessex Neonatal Networks                              | Dr Ruth Wigfield      |
| City Hospital, Birmingham                      | Midlands South West Newborn Network                                   | Dr Julie Nycyk        |
| Broomfield Hospital                            | Norfolk, Suffolk & Cambridgeshire Neonatal Network                    | Dr Ahmed Hassan       |
| Calderdale Royal Hospital                      | Yorkshire Neonatal Network                                            | Dr Karin Schwarz      |
| Chesterfield & North Derbyshire Royal Hospital | North Trent Neonatal Network                                          | Dr Aiwyne Foo         |
| Colchester General Hospital                    | Norfolk, Suffolk & Cambridgeshire Neonatal Network                    | Dr Aravind Shastri    |
| Countess of Chester Hospital                   | Cheshire and Merseyside Neonatal Network                              | Dr Stephen Brearey    |
| Croydon University Hospital                    | London - South West Neonatal Network                                  | Dr John Chang         |
| Diana Princess of Wales Hospital               | North Trent Neonatal Network                                          | Dr Pauline Adiotomre  |
| Doncaster Royal Infirmary                      | North Trent Neonatal Network                                          | Dr Jamal S Ahmed      |
| Dorset County Hospital                         | Thames Valley & Wessex Neonatal Networks                              | Dr Abby Deketelaere   |
| East Surrey Hospital                           | South East Coast Neonatal ODN                                         | Dr K Abdul Khader     |
| Great Western Hospital                         | South West Region                                                     | Dr Stanley Zengeya    |
| Hillingdon Hospital                            | London - North West Neonatal Network                                  | Dr Tristan Bate       |
| Hinchingbrooke Hospital                        | Norfolk, Suffolk & Cambridgeshire Neonatal Network                    | Dr Hilary Dixon       |
| Ipswich Hospital                               | Norfolk, Suffolk & Cambridgeshire Neonatal Network                    | Dr Matthew James      |
| James Paget Hospital                           | Norfolk, Suffolk & Cambridgeshire Neonatal Network                    | Dr Ambadkar           |
| Kettering General Hospital                     | Midlands Central Neonatal Network                                     | Dr Patty Rao          |
| King's Mill Hospital                           | Trent Perinatal Network                                               | Dr Dhaval Dave        |
| Kingston Hospital                              | London - South West Neonatal Network                                  | Dr Vinay Pai          |
| Leighton Hospital                              | Cheshire and Merseyside Neonatal Network                              | Dr Jayachandran       |
| Lincoln County Hospital                        | Trent Perinatal Network                                               | Dr Kollipara          |
| Lister Hospital                                | Beds-Herts Neonatal Network                                           | Dr J Kefas            |
| Macclesfield District General Hospital         | Cheshire and Merseyside Neonatal Network                              | Dr Gail Whitehead     |
| Manor Hospital                                 | Staffordshire, Shropshire & Black Country Newborn & Maternity Network | Dr Krishnamurthy      |
| Milton Keynes Foundation Trust Hospital        | Thames Valley & Wessex Neonatal Networks                              | Dr I Misra            |
| Newham General Hospital                        | London - North East and North Middlesex Neonatal Network              | Dr Imdad Ali          |
| North Middlesex University Hospital            | London - North East and North Middlesex Neonatal Network              | Dr Lesley Alsford     |
| North Tyneside General Hospital                | Northern Neonatal Network                                             | Vivien Spencer        |
| Northampton General Hospital                   | Midlands Central Neonatal Network                                     | Dr Subodh Gupta       |
| Northwick Park Hospital                        | London - North West Neonatal Network                                  | Dr Richard Nicholl    |
| Ormskirk District General Hospital             | Cheshire and Merseyside Neonatal Network                              | Dr Tim McBride        |
| Peterborough City Hospital                     | Norfolk, Suffolk & Cambridgeshire Neonatal Network                    | Dr Katharine McDevitt |
| Pinderfields General Hospital                  | Yorkshire Neonatal Network                                            | Dr David Gibson       |
| Poole Hospital NHS Foundation Trust            | Thames Valley & Wessex Neonatal Networks                              | Prof Minesh Khashu    |
| Princess Alexandra Hospital                    | Norfolk, Suffolk & Cambridgeshire Neonatal Network                    | Dr Caitlin Toh        |
| Queen Elizabeth Hospital, King's Lynn          | Norfolk, Suffolk & Cambridgeshire Neonatal Network                    | Dr Glynis Rewitzky    |
| Queen Elizabeth Hospital, Woolwich             | London - South East Neonatal Network                                  | Dr Olutoyin Banjoko   |
| Queen's Hospital, Romford                      | London - North East and North Middlesex Neonatal Network              | Dr Wilson Lopez       |

|                                         |                                                                       |                        |
|-----------------------------------------|-----------------------------------------------------------------------|------------------------|
| Rotherham District General Hospital     | North Trent Neonatal Network                                          | Dr Shameel Mattara     |
| Royal Albert Edward Infirmary           | Greater Manchester Neonatal Network                                   | Dr Christos Zipitis    |
| Royal Berkshire Hospital                | Thames Valley & Wessex Neonatal Networks                              | Dr Peter De Halpert    |
| Royal Cornwall Hospital                 | South West Region                                                     | Dr Paul Munyard        |
| Royal Derby Hospital                    | Trent Perinatal Network                                               | Dr John McIntyre       |
| Royal Devon & Exeter Hospital           | South West Region                                                     | Dr David Bartle        |
| Royal Hampshire County Hospital         | Thames Valley & Wessex Neonatal Networks                              | Dr Katie Yallop        |
| Royal Lancaster Infirmary               | Lancashire and South Cumbria Neonatal Network                         | Dr Joanne Fedee        |
| Royal Oldham Hospital                   | Greater Manchester Neonatal Network                                   | Dr Natasha Maddock     |
| Royal Shrewsbury Hospital               | Staffordshire, Shropshire & Black Country Newborn & Maternity Network | Dr Deshpande           |
| Royal United Hospital                   | South West Region                                                     | Dr Stephen Jones       |
| Russells Hall Hospital                  | Staffordshire, Shropshire & Black Country Newborn & Maternity Network | Dr Mahadevan           |
| Salisbury District Hospital             | Thames Valley & Wessex Neonatal Networks                              | Dr Nick Brown          |
| Scunthorpe General Hospital             | North Trent Neonatal Network                                          | Dr Pauline Adiotomre   |
| Southend Hospital                       | London - North East and North Middlesex Neonatal Network              | Dr Arfa Khan           |
| St Helier Hospital                      | London - South West Neonatal Network                                  | Dr Salim Yasin         |
| St Mary's Hospital, IOW                 | Thames Valley & Wessex Neonatal Networks                              | Dr Sian Butterworth    |
| St Mary's Hospital, London              | London - North West Neonatal Network                                  | Dr Sunit Godambe       |
| St Richard's Hospital                   | Thames Valley & Wessex Neonatal Networks                              | Dr Nick Brennan        |
| Stepping Hill Hospital                  | Greater Manchester Neonatal Network                                   | Dr Carrie Heal         |
| Stoke Mandeville Hospital               | Thames Valley & Wessex Neonatal Networks                              | Dr Sanjay Salgia       |
| Tameside General Hospital               | Greater Manchester Neonatal Network                                   | Dr Jacqueline Birch    |
| Taunton & Somerset Hospital             | South West Region                                                     | Dr Chris Knight        |
| Tunbridge Wells Hospital                | South East Coast Neonatal ODN                                         | Dr Hamudi Kisat        |
| University Hospital Lewisham            | London - South East Neonatal Network                                  | Dr Jauro Kuna          |
| University Hospital of North Durham     | Northern Neonatal Network                                             | Dr Mehdi Garbash       |
| University Hospital of South Manchester | Greater Manchester Neonatal Network                                   | Dr Gopi Vemuri         |
| Victoria Hospital, Blackpool            | Lancashire and South Cumbria Neonatal Network                         | Dr Chris Rawlingson    |
| Warrington Hospital                     | Cheshire and Merseyside Neonatal Network                              | Dr Delyth Webb         |
| Watford General Hospital                | Beds-Herts Neonatal Network                                           | Dr Sankara Narayanan   |
| West Suffolk Hospital                   | Norfolk, Suffolk & Cambridgeshire Neonatal Network                    | Dr Ian Evans           |
| Wexham Park Hospital                    | Thames Valley & Wessex Neonatal Networks                              | Dr Rekha Sanghavi      |
| Whipps Cross University Hospital        | London - North East and North Middlesex Neonatal Network              | Dr Caroline Sullivan   |
| Whiston Hospital                        | Cheshire and Merseyside Neonatal Network                              | Dr Rosaline Garr       |
| Whittington Hospital                    | London - North Central Neonatal Network                               | Dr Wynne Leith         |
| Worcestershire Royal Hospital           | Midlands South West Newborn Network                                   | Dr Andrew Gallagher    |
| York District Hospital                  | Yorkshire Neonatal Network                                            | Dr Guy Millman         |
| Gloucestershire Royal Hospital          | South West Region                                                     | Dr Simon Pirie         |
| Arrowe Park Hospital                    | Cheshire and Merseyside Neonatal Network                              | Dr Anand Kamalanathan  |
| Birmingham Heartlands Hospital          | Midlands South West Newborn Network                                   | Dr Phil Simmons        |
| Birmingham Women's Hospital             | Midlands South West Newborn Network                                   | Dr Anju Singh          |
| Bradford Royal Infirmary                | Yorkshire Neonatal Network                                            | Dr Sunita Seal         |
| Chelsea & Westminster Hospital          | London - North West Neonatal Network                                  | Dr Mark Thomas         |
| Derriford Hospital                      | South West Region                                                     | Dr Alex Allwood        |
| Guy's & St Thomas' Hospital             | London - South East Neonatal Network                                  | Dr Timothy Watts       |
| Homerton Hospital                       | London - North East and North Middlesex Neonatal Network              | Dr Narendra Aladangady |
| hull royal infirmary                    | Yorkshire Neonatal Network                                            | Dr Hassan Gaili        |
| James Cook University Hospital          | Northern Neonatal Network                                             | Dr M Lal               |
| King's College Hospital                 | London - South East Neonatal Network                                  | Dr Ann Hickey          |
| Lancashire Women & Newborn Centre       | Lancashire and South Cumbria Neonatal Network                         | Dr Meera Lama          |
| Leeds Neonatal Service                  | Yorkshire Neonatal Network                                            | Dr Lawrence Miall      |
| Leicester Neonatal Service              | Midlands Central Neonatal Network                                     | Dr Jonathan Cusack     |

|                                                      |                                                                       |                     |
|------------------------------------------------------|-----------------------------------------------------------------------|---------------------|
| Liverpool Women's Hospital                           | Cheshire and Merseyside Neonatal Network                              | Dr Bill Yoxall      |
| Luton & Dunstable Hospital                           | Beds-Herts Neonatal Network                                           | Dr Jennifer Birch   |
| Medway Maritime Hospital                             | South East Coast Neonatal ODN                                         | Dr Aung Soe         |
| New Cross Hospital                                   | Staffordshire, Shropshire & Black Country Newborn & Maternity Network | Dr Tilly Pillay     |
| Norfolk & Norwich University Hospital                | Norfolk, Suffolk & Cambridgeshire Neonatal Network                    | Dr Mark Dyke        |
| Nottingham City Hospital                             | Trent Perinatal Network                                               | Dr Steven Wardle    |
| Nottingham University Hospital (QMC)                 | Trent Perinatal Network                                               | Dr Steven Wardle    |
| Oxford University Hospitals, John Radcliffe Hospital | Thames Valley & Wessex Neonatal Networks                              | Dr Eleri Adams      |
| Princess Anne Hospital                               | Thames Valley & Wessex Neonatal Networks                              | Dr Mike Hall        |
| Queen Alexandra Hospital                             | Thames Valley & Wessex Neonatal Networks                              | Dr Charlotte Groves |
| Queen Charlotte's Hospital                           | London - North West Neonatal Network                                  | Dr Sunit Godambe    |
| Rosie Maternity Hospital, Addenbrookes               | Norfolk, Suffolk & Cambridgeshire Neonatal Network                    | Dr Angela D'Amore   |
| Royal Bolton Hospital                                | Greater Manchester Neonatal Network                                   | Dr Paul Settle      |
| Royal Preston Hospital                               | Lancashire and South Cumbria Neonatal Network                         | Dr Richa Gupta      |
| Royal Stoke University Hospital                      | Staffordshire, Shropshire & Black Country Newborn & Maternity Network | Dr Alison Moore     |
| Royal Sussex County Hospital                         | South East Coast Neonatal ODN                                         | Dr P Amess          |
| Royal Victoria Infirmary                             | Northern Neonatal Network                                             | Dr Alan Fenton      |
| NORTH BRISTOL NHS TRUST (SOUTHMEAD)                  | South West Region                                                     | Dr Paul Mannix      |
| St George's Hospital                                 | London - South West Neonatal Network                                  | Dr Charlotte Huddy  |
| St Mary's Hospital, Manchester                       | Greater Manchester Neonatal Network                                   | Dr Ngozi Edi-Osagie |
| St Michael's Hospital                                | South West Region                                                     | Dr Pamela Cairns    |
| St Peter's Hospital                                  | South East Coast Neonatal ODN                                         | Dr Peter Reynolds   |
| Sunderland Royal Hospital                            | Northern Neonatal Network                                             | Dr Majd Abu-Harb    |
| The Jessop Wing, Sheffield                           | North Trent Neonatal Network                                          | Dr Simon Clark      |
| The Royal London Hospital - Constance Green          | London - North East and North Middlesex Neonatal Network              | Dr Vadivelam Murthy |
| University College Hospital                          | London - North Central Neonatal Network                               | Dr Giles Kendall    |
| University Hospital Coventry                         | Midlands Central Neonatal Network                                     | Dr Kate Blake       |
| University Hospital of North Tees                    | Northern Neonatal Network                                             | Dr Hari Kumar       |
| William Harvey Hospital                              | South East Coast Neonatal ODN                                         | Dr Vimal Vasu       |
